# Supplementary material for: ACTB Mutations Analysis and Genotype–Phenotype Correlation in Becker’s Nevus
Source: MDPI journal article supplement (doi:10.3390/biomedicines9121879), 2021-12-10
Supplement: s1 [file s1]

**Table S1.** Primer sequence of *ACTB* gene.

| Number                   | Sequence                 |
|--------------------------|--------------------------|
| Primer-Exon 1            |                          |
| Forward                  | GACCTCGGCTCACAGCG        |
| Reverse                  | CCTGTGCAGAGAAAGCGCC      |
| Primer-Exon 2            |                          |
| I-Forward                | AGGGCTTCTTGTCTTTTCCTTCC  |
| I-Reverse                | TTGTAGAAGGTGTGGTGCCAGATT |
| II-Forward               | CATCGAGCACGGCATCGT       |
| II-Reverse               | GAAAACGGCAGAAGAGAGAACCA  |
| Primer-Exon 3            |                          |
| I-Forward                | TTCTGCATGTCCCCCGTCT      |
| I-Reverse                | GGAGGGCATACCCCTCGTAGA    |
| II-Forward               | GTGATGGACTCCGGTGACG      |
| II-Reverse               | GGTAACCCTCATGTCAGGCAGA   |
| Primer-Exon 4            |                          |
| Forward                  | TGTGGAAGCTAAGTCCTGCC     |
| Reverse                  | GTGACAGCTCCCCACACAC      |
| Primer-Exon 5            |                          |
| Forward                  | GAGCTGTCACATCCAGGGTC     |
| Reverse                  | TGCGCAAGTTAGGTTTTGTCA    |
| Primer-before digestion* |                          |
| Forward                  | ACATGGTGTATCTCTGCCTTACA  |
| Reverse                  | GAGGGCATACCCCTCGTAGA     |
| Primer-after digestion*  |                          |
| Forward                  | CTTCAACACCCCAGCCATGT     |
| Reverse                  | TAGATGGGCACAGTGTGGGT     |

\* Primers used in the enrichment assay.

**Table S2.** Clinical information of the patients with Becker's nevus.

| Number | location       | Size | Hair | Other             |
|--------|----------------|------|------|-------------------|
| 2948   | left shoulder  | 2%   | ✓    | Papules, scales   |
| 3138   | right arm      | 1%   | ✓    | Papules, erythema |
| 3989   | right shoulder | 3%   | ✓    | Papules           |
| 4108   | right chest    | 1%   | ×    | Papules           |
| 4066   | left knee      | <1%  | ✓    | Erythema          |
| 4068   | right ankle    | <1%  | ×    | Scales            |
| 4229   | right arm      | <1%  | ✓    |                   |
| 4305   | right elbow    | <1%  | ✓    | Erythema          |
| 4377   | right leg      | 19%  | ✓    |                   |
| 4448   | right shank    | 3%   | ✓    | Papules           |
| 0591   | right face     | 1%   | ×    | Papules           |
| 1624   | right waist    | 1%   | ✓    |                   |
| 1767   | left waist     | 4%   | ×    | Scales            |
| 0190   | left chest     | 2%   | ✓    | Folliculitis      |
| 0198   | left chest     | 1%   | ×    | Papules           |
| 0497   | back           | 10%  | ×    |                   |
| 3199   | left neck      | <1%  | ✓    | Scales            |
| 0738   | left shoulder  | 3%   | ×    | Papules, erythema |
| 0051   | left ankle     | <1%  | ✓    |                   |

✓, with hairy presentation; ×, without hairy presentation.

**Table S3.** Pathological data of the patients with Becker's nevus.

| Number | Epidermal rete |        |            | Hyperkeratosis | Acanthosis | Basal<br>hyperpigmentation | Dermal<br>lymphocytes<br>infiltration | Dermal<br>fibrosis | Sebaceous<br>gland<br>hyperplasia | Hyperplasia of<br>arrector pili<br>muscle |
|--------|----------------|--------|------------|----------------|------------|----------------------------|---------------------------------------|--------------------|-----------------------------------|-------------------------------------------|
|        | Elongation     | Fusion | Flattening |                |            |                            |                                       |                    |                                   |                                           |
| 2948   | ✓              | ✓      | ✓          | ✓              | ✓          | ×                          | ✓                                     | ×                  | ×                                 | ✓                                         |
| 3138   | ✓              | ✓      | ✓          | ✓              | ✓          | ✓                          | ✓                                     | ✓                  | ×                                 | ✓                                         |
| 3989   | ✓              | ✓      | ✓          | ✓              | ✓          | ✓                          | ✓                                     | ×                  | ×                                 | ✓                                         |
| 4108   | ✓              | ✓      | ✓          | ✓              | ✓          | ✓                          | ✓                                     | ✓                  | ×                                 | ✓                                         |
| 4066   | ✓              | ×      | ×          | ×              | ×          | ×                          | ✓                                     | ✓                  | ×                                 | ×                                         |
| 4068   | ✓              | ✓      | ✓          | ×              | ×          | ✓                          | ✓                                     | ×                  | ×                                 | ×                                         |
| 4229   | ✓              | ✓      | ✓          | ✓              | ✓          | ✓                          | ✓                                     | ✓                  | ×                                 | ×                                         |
| 4305   | ✓              | ✓      | ✓          | ✓              | ✓          | ×                          | ✓                                     | ✓                  | ✓                                 | ✓                                         |
| 4377   | ✓              | ✓      | ✓          | ×              | ×          | ✓                          | ✓                                     | ×                  | ×                                 | ✓                                         |
| 4448   | ✓              | ✓      | ✓          | ✓              | ✓          | ✓                          | ✓                                     | ×                  | ×                                 | ×                                         |
| 0591   | ✓              | ✓      | ✓          | ✓              | ✓          | ✓                          | ✓                                     | ×                  | ×                                 | ✓                                         |
| 1624   | ✓              | ✓      | ✓          | ×              | ×          | ✓                          | ✓                                     | ×                  | ×                                 | ✓                                         |
| 1767   | ✓              | ✓      | ✓          | ✓              | ✓          | ✓                          | ✓                                     | ×                  | ✓                                 | ✓                                         |
| 0190   | ✓              | ✓      | ✓          | ×              | ×          | ✓                          | ✓                                     | ✓                  | ✓                                 | ✓                                         |
| 0198   | ✓              | ✓      | ✓          | ×              | ✓          | ✓                          | ✓                                     | ×                  | ×                                 | ✓                                         |
| 0497   | ✓              | ✓      | ✓          | ✓              | ✓          | ✓                          | ✓                                     | ✓                  | ×                                 | ×                                         |
| 3199   | ✓              | ✓      | ✓          | ×              | ×          | ✓                          | ✓                                     | ×                  | ×                                 | ✓                                         |
| 0738   | ✓              | ✓      | ✓          | ✓              | ✓          | ×                          | ✓                                     | ×                  | ✓                                 | ✓                                         |
| 0051   | ✓              | ✓      | ✓          | ×              | ×          | ✓                          | ✓                                     | ×                  | ×                                 | ×                                         |

✓, with corresponding presentation; ×, without corresponding presentation.
